# Supplementary material
Source: MDPI journal article supplement (https://www.mdpi.com/2313-0105/9/1/51)
Supplement: s1 [file s1]

# Enhancing performance of LiFePO<sub>4</sub> battery by using a novel gel composite polymer electrolyte

Ke Wu, Naiqi Hu, Shuchan Wang, Zhiyuan Geng, Ying Zhou and Wenwen Deng\*  
Institute of Materials Science & Devices, School of Material Science and Engineering, Suzhou  
University of Science and Technology, Suzhou 215000, China

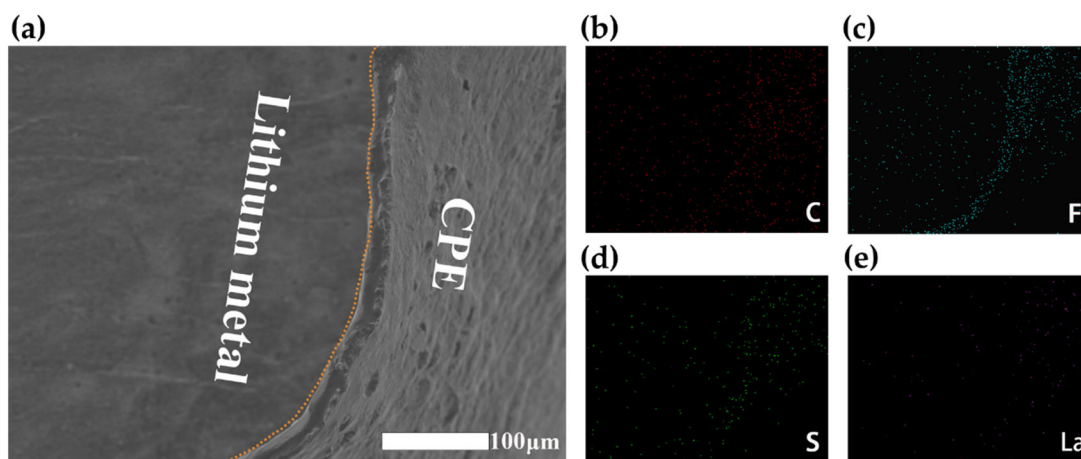

**Figure S1.** a) Cross section SEM of CPE/Li. b), c), d), e) EDS mapping of C, S, F, La for CPE/Li.

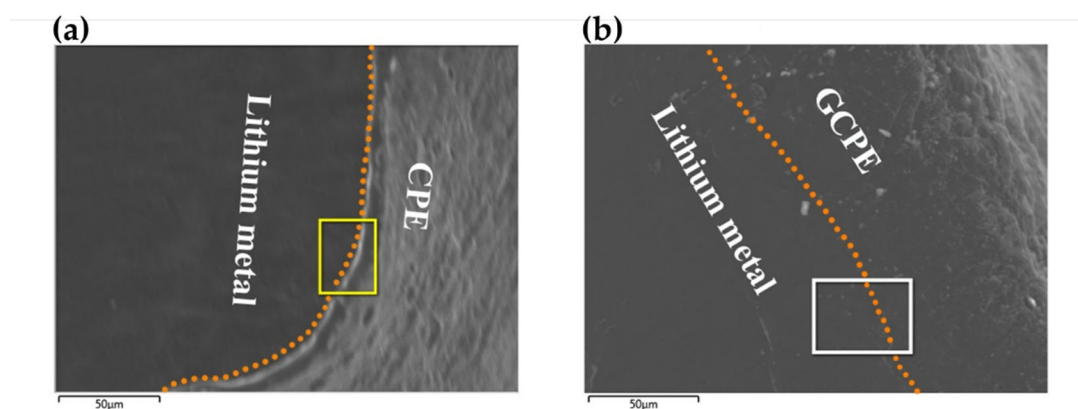

**Figure S2.** a), b) SEM of demarcated area for CPE/Li and GCPE/L

**Table S1.** Element content of selected area for FigureS2a (CPE/Li).

| Element | Line Type | Apparent concentration | k ratio | Wt%   | Wt% Sigma | Sample labe  | Manufacturer's standard |
|---------|-----------|------------------------|---------|-------|-----------|--------------|-------------------------|
| C       | K         | 7.40                   | 0.07399 | 23.05 | 0.95      | Pure Element | Yes                     |
| F       | K         | 4.46                   | 0.03467 | 21.35 | 1.01      | CaF2         | Yes                     |
| S       | K         | 1.30                   | 0.01382 | 2.00  | 0.20      | FeS2         | Yes                     |
| Zr      | L         | 0.00                   | 0.00000 | 0.00  | 0.36      | Pure Element | Yes                     |
| La      | L         | 2.80                   | 0.02511 | 4.41  | 0.74      | LaB6         | Yes                     |

**Table S2.** Element content of selected area for FigureS2b (CPE/Li).

| Element | Line Type | Apparent concentration | k ratio | Wt%   | Wt% Sigma | Sample label | Manufacturer's standard |
|---------|-----------|------------------------|---------|-------|-----------|--------------|-------------------------|
| C       | K         | 10.01                  | 0.10006 | 14.38 | 0.18      | Pure Element | Yes                     |
| F       | K         | 5.75                   | 0.04471 | 14.56 | 0.21      | CaF2         | Yes                     |
| S       | K         | 1.14                   | 0.01212 | 0.83  | 0.04      | FeS2         | Yes                     |
| Zr      | L         | 1.22                   | 0.01218 | 0.93  | 0.10      | Pure Element | Yes                     |
| La      | L         | 6.49                   | 0.05826 | 4.70  | 0.16      | LaB6         | Yes                     |

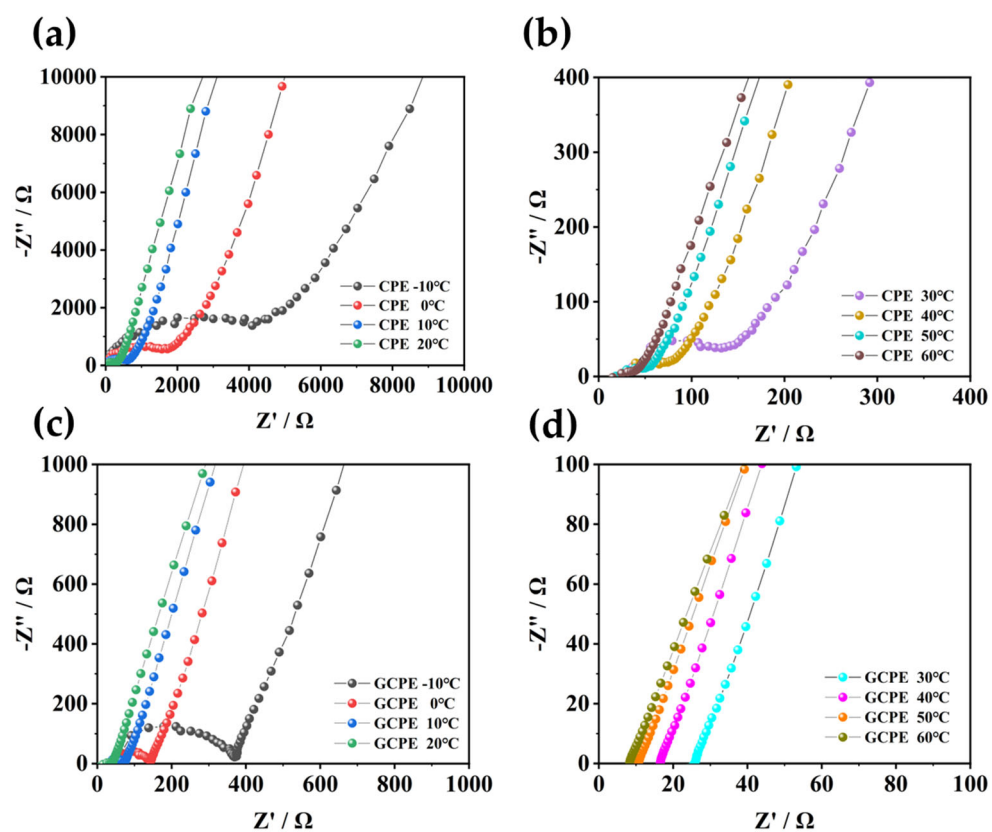

**Figure S3.** a) , b) , c) , d) EIS of SS/CPE/SS and SS/GCPE/SS at different evaluated temperatures.

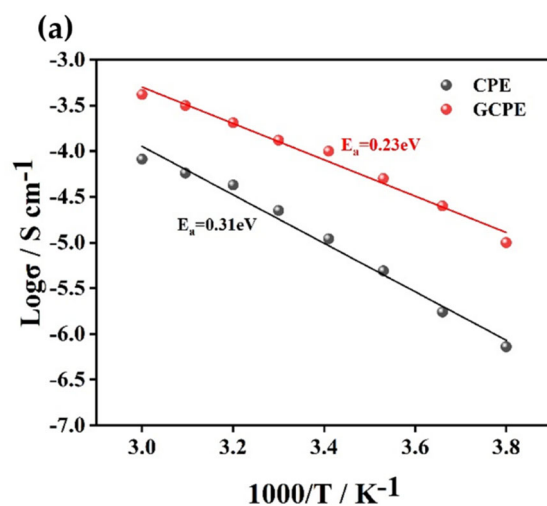

**Figure S4.** a) , The temperature dependency of ionic conductivity of CPE and GCPE.

**Table S3.** Changes of resistance values of each part before and after Li/CPE/Li and Li/GCPE/Li cycles for Figure 4b.

| Test object | Test conditions | $R_b$ | $R_{ct}$ | $R_i$ |
|-------------|-----------------|-------|----------|-------|
| Li/CPE/Li   | Before cycling  | 91Ω   | 391Ω     | 15Ω   |
|             | After cycling   | 87Ω   | 470Ω     | 21Ω   |
| Li/GCPE/Li  | Before cycling  | 19Ω   | 72Ω      | 8Ω    |
|             | After cycling   | 25Ω   | 78Ω      | 7Ω    |

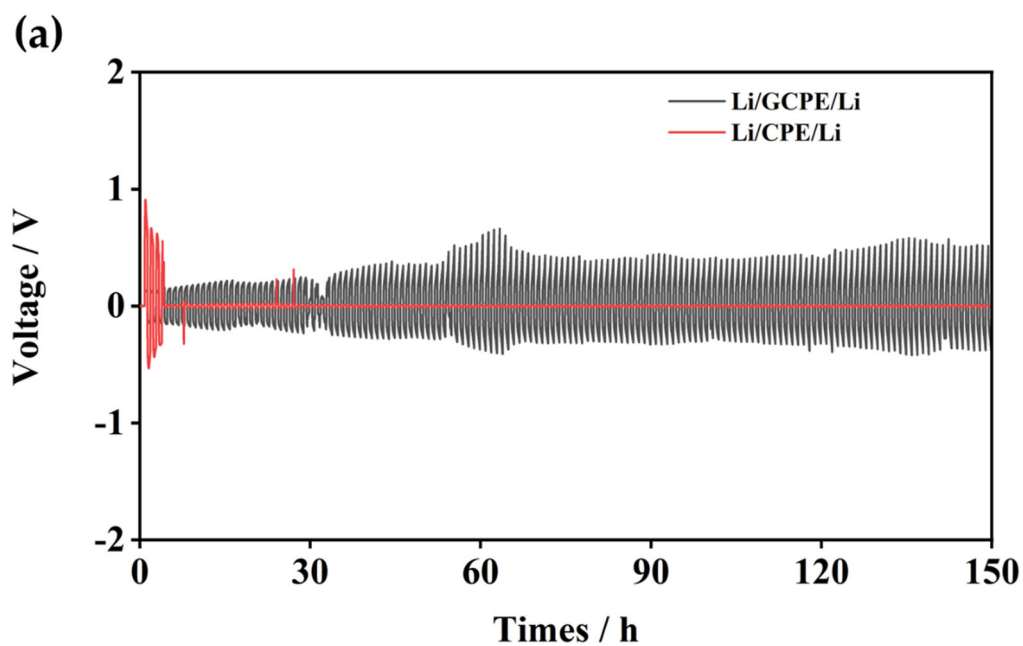

**Figure S5.** Symmetric-cell cycling of Li/CPE/Li(red line) and Li/GCPE/Li(black line). The current density was fixed at  $0.5 \text{ mA cm}^{-2}$  during the tests.

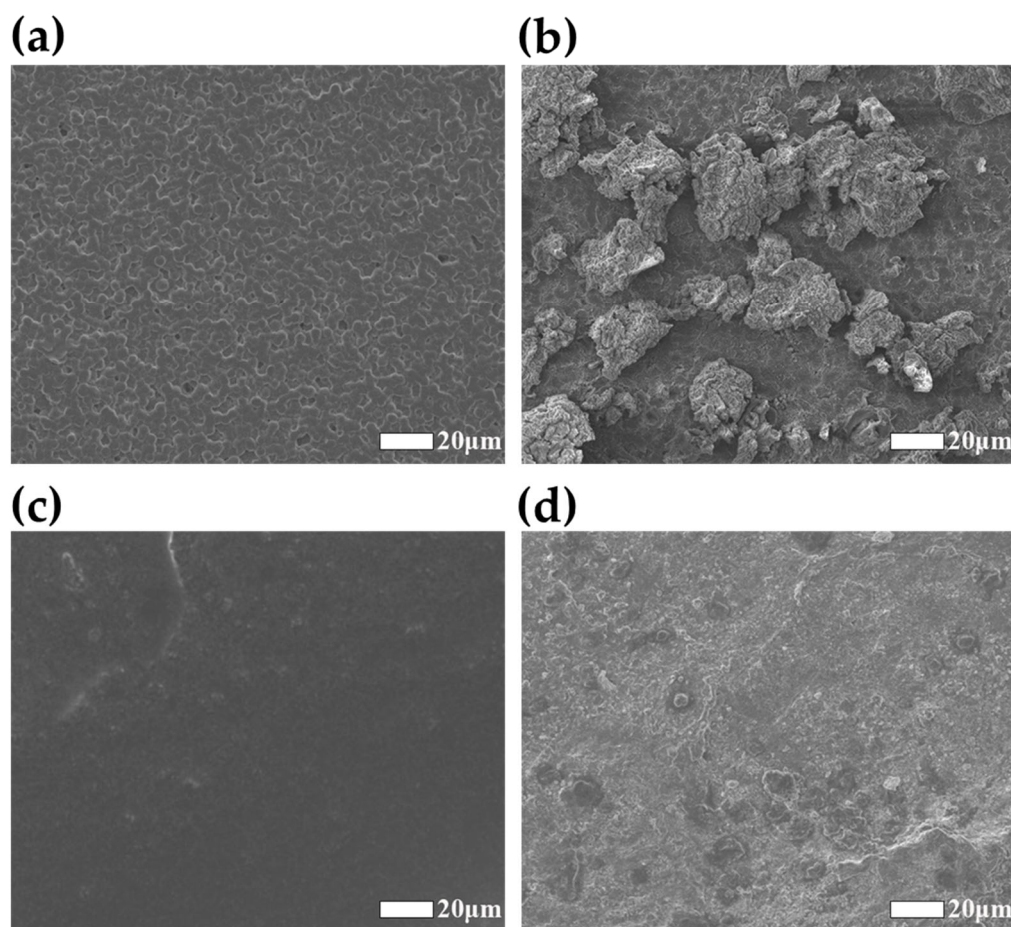

**Figure S6.** a) , b) SEM of CPE before and after cycling for 700h . c), d) SEM of GCPE before and after cycling for 700 h.

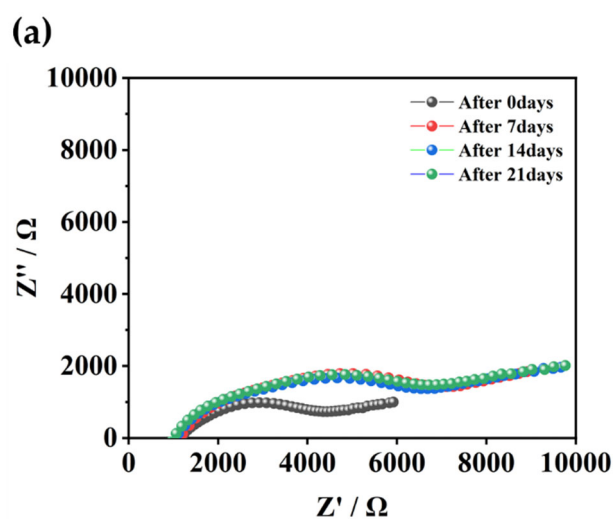

**Figure S7.** a) The EIS of LFP/CPE/Li battery for different aging time.

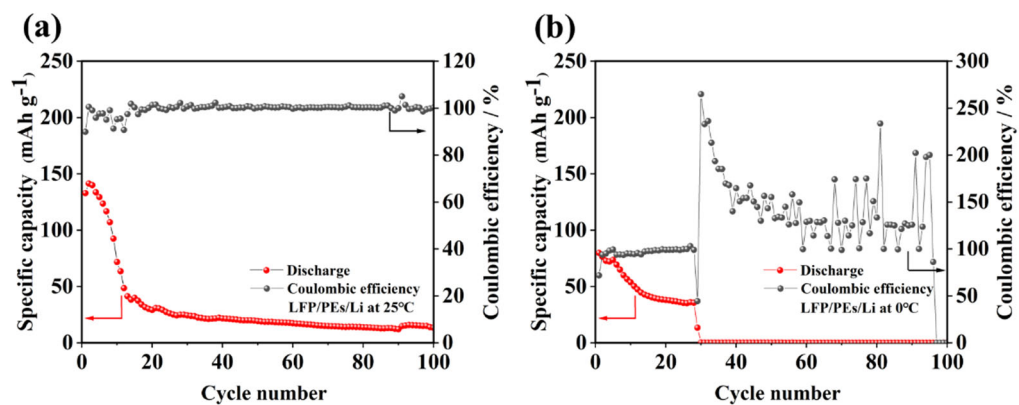

**Figure S8.** a) Cycling performance of LFP/PEs/Li at room temperature and b) at 0 °C at 0.1C respectively.
